# Supplementary material
Source: Research Square preprint supplement (doi:10.21203/rs.3.rs-9181572/v1)
Supplement: Supplementary file 1 [file 27fd5753c6cc160edb9404f9.pdf]

## Ultrasound-assisted extraction of cytotoxic alkaloids from *Caliphurria subedentata*: Comparative analysis of Bath and High-Intensity systems

Sergio Gonzalez-Lopez<sup>1</sup>, Lina M. Trujillo Chacón<sup>1</sup>, Edison Osorio<sup>1\*</sup>.

<sup>1</sup>Grupo de Investigación en Sustancias Bioactivas GISB, Facultad de Ciencias Farmacéuticas y Alimentarias, Universidad de Antioquia, Calle 70 No. 52-21, Medellín 0500100, Colombia.

\*Corresponding author:

E-mail address: [edison.osorio@udea.edu.co](mailto:edison.osorio@udea.edu.co) (E. Osorio).

### Supplementary Material

**Table S1.** Coded input factors and levels defined for the experimental design with two factors and two levels.

| Block | BUAE                         |                      | HIUAE                        |                      |
|-------|------------------------------|----------------------|------------------------------|----------------------|
|       | Extraction time <sup>a</sup> | Solvent <sup>b</sup> | Extraction time <sub>a</sub> | Solvent <sup>b</sup> |
| 1     | -1                           | -1                   | -1                           | 1                    |
| 1     | 1                            | 1                    | -1                           | -1                   |
| 1     | -1                           | 1                    | 1                            | 1                    |
| 1     | 1                            | -1                   | 1                            | -1                   |
| 2     | 1                            | 1                    | -1                           | 1                    |
| 2     | -1                           | 1                    | 1                            | -1                   |
| 2     | -1                           | -1                   | -1                           | -1                   |
| 2     | 1                            | -1                   | 1                            | 1                    |
| 3     | 1                            | -1                   | 1                            | -1                   |
| 3     | -1                           | -1                   | 1                            | 1                    |
| 3     | 1                            | 1                    | -1                           | 1                    |
| 3     | -1                           | 1                    | -1                           | -1                   |

<sup>a</sup> Min. <sup>b</sup> Methanol: Water (v/v)

**Table S2.** Factors and levels defined for the experimental design with two factors and two levels.

| <b>Factors</b>               | <b>Level</b> | <b>BUAE<sup>a</sup></b> | <b>HIUAE<sup>b</sup></b> |
|------------------------------|--------------|-------------------------|--------------------------|
| <b>Extraction time (min)</b> | 1            | 10                      | 7                        |
|                              | -1           | 60                      | 13                       |
| <b>Solvent <sup>c</sup></b>  | 1            | 1: 0                    | 1: 0                     |
|                              | -1           | 1: 1                    | 1: 1                     |

<sup>a</sup> BUAE, Bath Ultrasound Assisted Extraction. <sup>b</sup> HIUAE, High Intensity Ultrasound Assisted Extraction. <sup>c</sup> Methanol: Water (v/v)

**Table S3.** Coded input factors and defined levels for HIUAE optimization.

|           | <b>Block</b> | <b>Solvent*</b> | <b>Solid: Liquid</b> |
|-----------|--------------|-----------------|----------------------|
| <b>1</b>  | 1            | -1              | 0                    |
| <b>2</b>  | 1            | 0               | 1                    |
| <b>3</b>  | 1            | 1               | 0                    |
| <b>4</b>  | 1            | -1              | 1                    |
| <b>5</b>  | 1            | -1              | -1                   |
| <b>6</b>  | 1            | 0               | -1                   |
| <b>7</b>  | 1            | 1               | 1                    |
| <b>8</b>  | 1            | 0               | 0                    |
| <b>9</b>  | 1            | 0               | 0                    |
| <b>10</b> | 1            | 1               | -1                   |
| <b>11</b> | 2            | -1              | 0                    |
| <b>12</b> | 2            | 0               | 1                    |
| <b>13</b> | 2            | 1               | 0                    |
| <b>14</b> | 2            | -1              | 1                    |
| <b>15</b> | 2            | -1              | -1                   |
| <b>16</b> | 2            | 0               | -1                   |
| <b>17</b> | 2            | 1               | 1                    |
| <b>18</b> | 2            | 0               | 0                    |
| <b>19</b> | 2            | 0               | 0                    |
| <b>20</b> | 2            | 1               | -1                   |
| <b>21</b> | 3            | -1              | 0                    |
| <b>22</b> | 3            | 0               | 1                    |
| <b>23</b> | 3            | 1               | 0                    |
| <b>24</b> | 3            | -1              | 1                    |
| <b>25</b> | 3            | -1              | -1                   |
| <b>26</b> | 3            | 0               | -1                   |
| <b>27</b> | 3            | 1               | 1                    |
| <b>28</b> | 3            | 0               | 0                    |
| <b>29</b> | 3            | 0               | 0                    |
| <b>30</b> | 3            | 1               | -1                   |

\*Methanol: Water (v/v)

**Table S4.** Factors and levels defined for HIUAE optimization.

| Level | Solid: Liquid | Solvent* |
|-------|---------------|----------|
| -1    | 1:10          | 7:3      |
| 0     | 1:20          | 8.5:1.5  |
| 1     | 1:30          | 1:0      |

\*Methanol: Water (v/v)

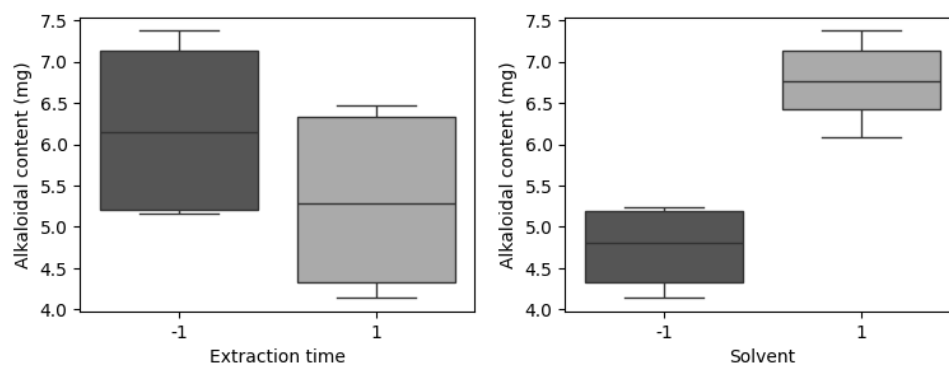

**Figure S1.** Effect of extraction time and solvent on alkaloidal extract yield

**Table S5.** Alkaloidal profile of *C. subedentata* obtained by Soxhlet, BUAE and HIUAE by GC-MS.

| #                        | Compound                   | RT <sup>a</sup> | m/z                                               | µg Gal/g AE <sup>b</sup> |      |       |
|--------------------------|----------------------------|-----------------|---------------------------------------------------|--------------------------|------|-------|
|                          |                            |                 |                                                   | Soxhlet                  | BUAE | HIUAE |
| <b>Galanthamine type</b> |                            |                 |                                                   |                          |      |       |
| 1                        | Galanthamine               | 15.76           | 287(M <sup>+</sup> , 81), 286(100),<br>216(36)    | 0.03                     | 1.18 | 1.76  |
| 2                        | Narwedine                  | 16.35           | 285 (M <sup>+</sup> , 81), 284 (100),<br>199 (67) | nd                       | 0.13 | 0.10  |
| <b>Haemantamine type</b> |                            |                 |                                                   |                          |      |       |
| 3                        | 8-O-Demethylmaritidine     | 16.86           | 273 (M <sup>+</sup> , 100), 201 (95),<br>189 (62) | 0.06                     | 0.66 | 0.53  |
| 4                        | Haemantamine               | 17.81           | 301 (M <sup>+</sup> , 13), 272 (100),<br>181 (30) | nd                       | 0.32 | 0.68  |
| <b>Tazettine type</b>    |                            |                 |                                                   |                          |      |       |
| 5                        | 6-O-Methylpretazettine     | 17.54           | 345 (M <sup>+</sup> , 18), 261 (100),<br>239 (31) | nd                       | nd   | 0.05  |
| 6                        | Tazettine                  | 17.90           | 331(M <sup>+</sup> , 27), 298(21),<br>247(100)    | 0.02                     | 0.14 | 0.89  |
| <b>Narciclasine type</b> |                            |                 |                                                   |                          |      |       |
| 7                        | Trisphaeridine             | 15.97           | 223(M <sup>+</sup> , 100) 222(38),<br>138(30)     | 0.03                     | 0.40 | 0.52  |
| <b>Lycorine type</b>     |                            |                 |                                                   |                          |      |       |
| 8                        | Lycorine                   | 18.68           | 287(M <sup>+</sup> , 21), 227(64),<br>226(100)    | 0.03                     | 0.13 | 0.54  |
| 9                        | Anhydrolycorine            | 16.97           | 251(M <sup>+</sup> , 42) 250(100),<br>191(18)     | 0.02                     | 0.04 | 0.84  |
| 10                       | 11-12-dehydrolycorene      | 17.16           | 253(M <sup>+</sup> , 51) 252(100),<br>224(12)     | nd                       | 0.61 | 0.80  |
| 11                       | Homolycorine type alkaloid | 19.03           | 108 (M <sup>+</sup> , 11), 250(1),<br>109(100).   | 0.02                     | 0.69 | 1.94  |

<sup>a</sup> RT, Retention time (min). <sup>b</sup> Quantitative values obtained by response factor of the external Galanthamine standard (microgram of galanthamine per gram of alkaloid extract). nd, Not detected.
