# Supplementary material
Source: Research Square preprint supplement (doi:10.21203/rs.3.rs-9181572/v1)
Supplement: Supplementary file 2 [file 783570c847661970149ebe23.pdf]

# *Caliphruria subedentata*

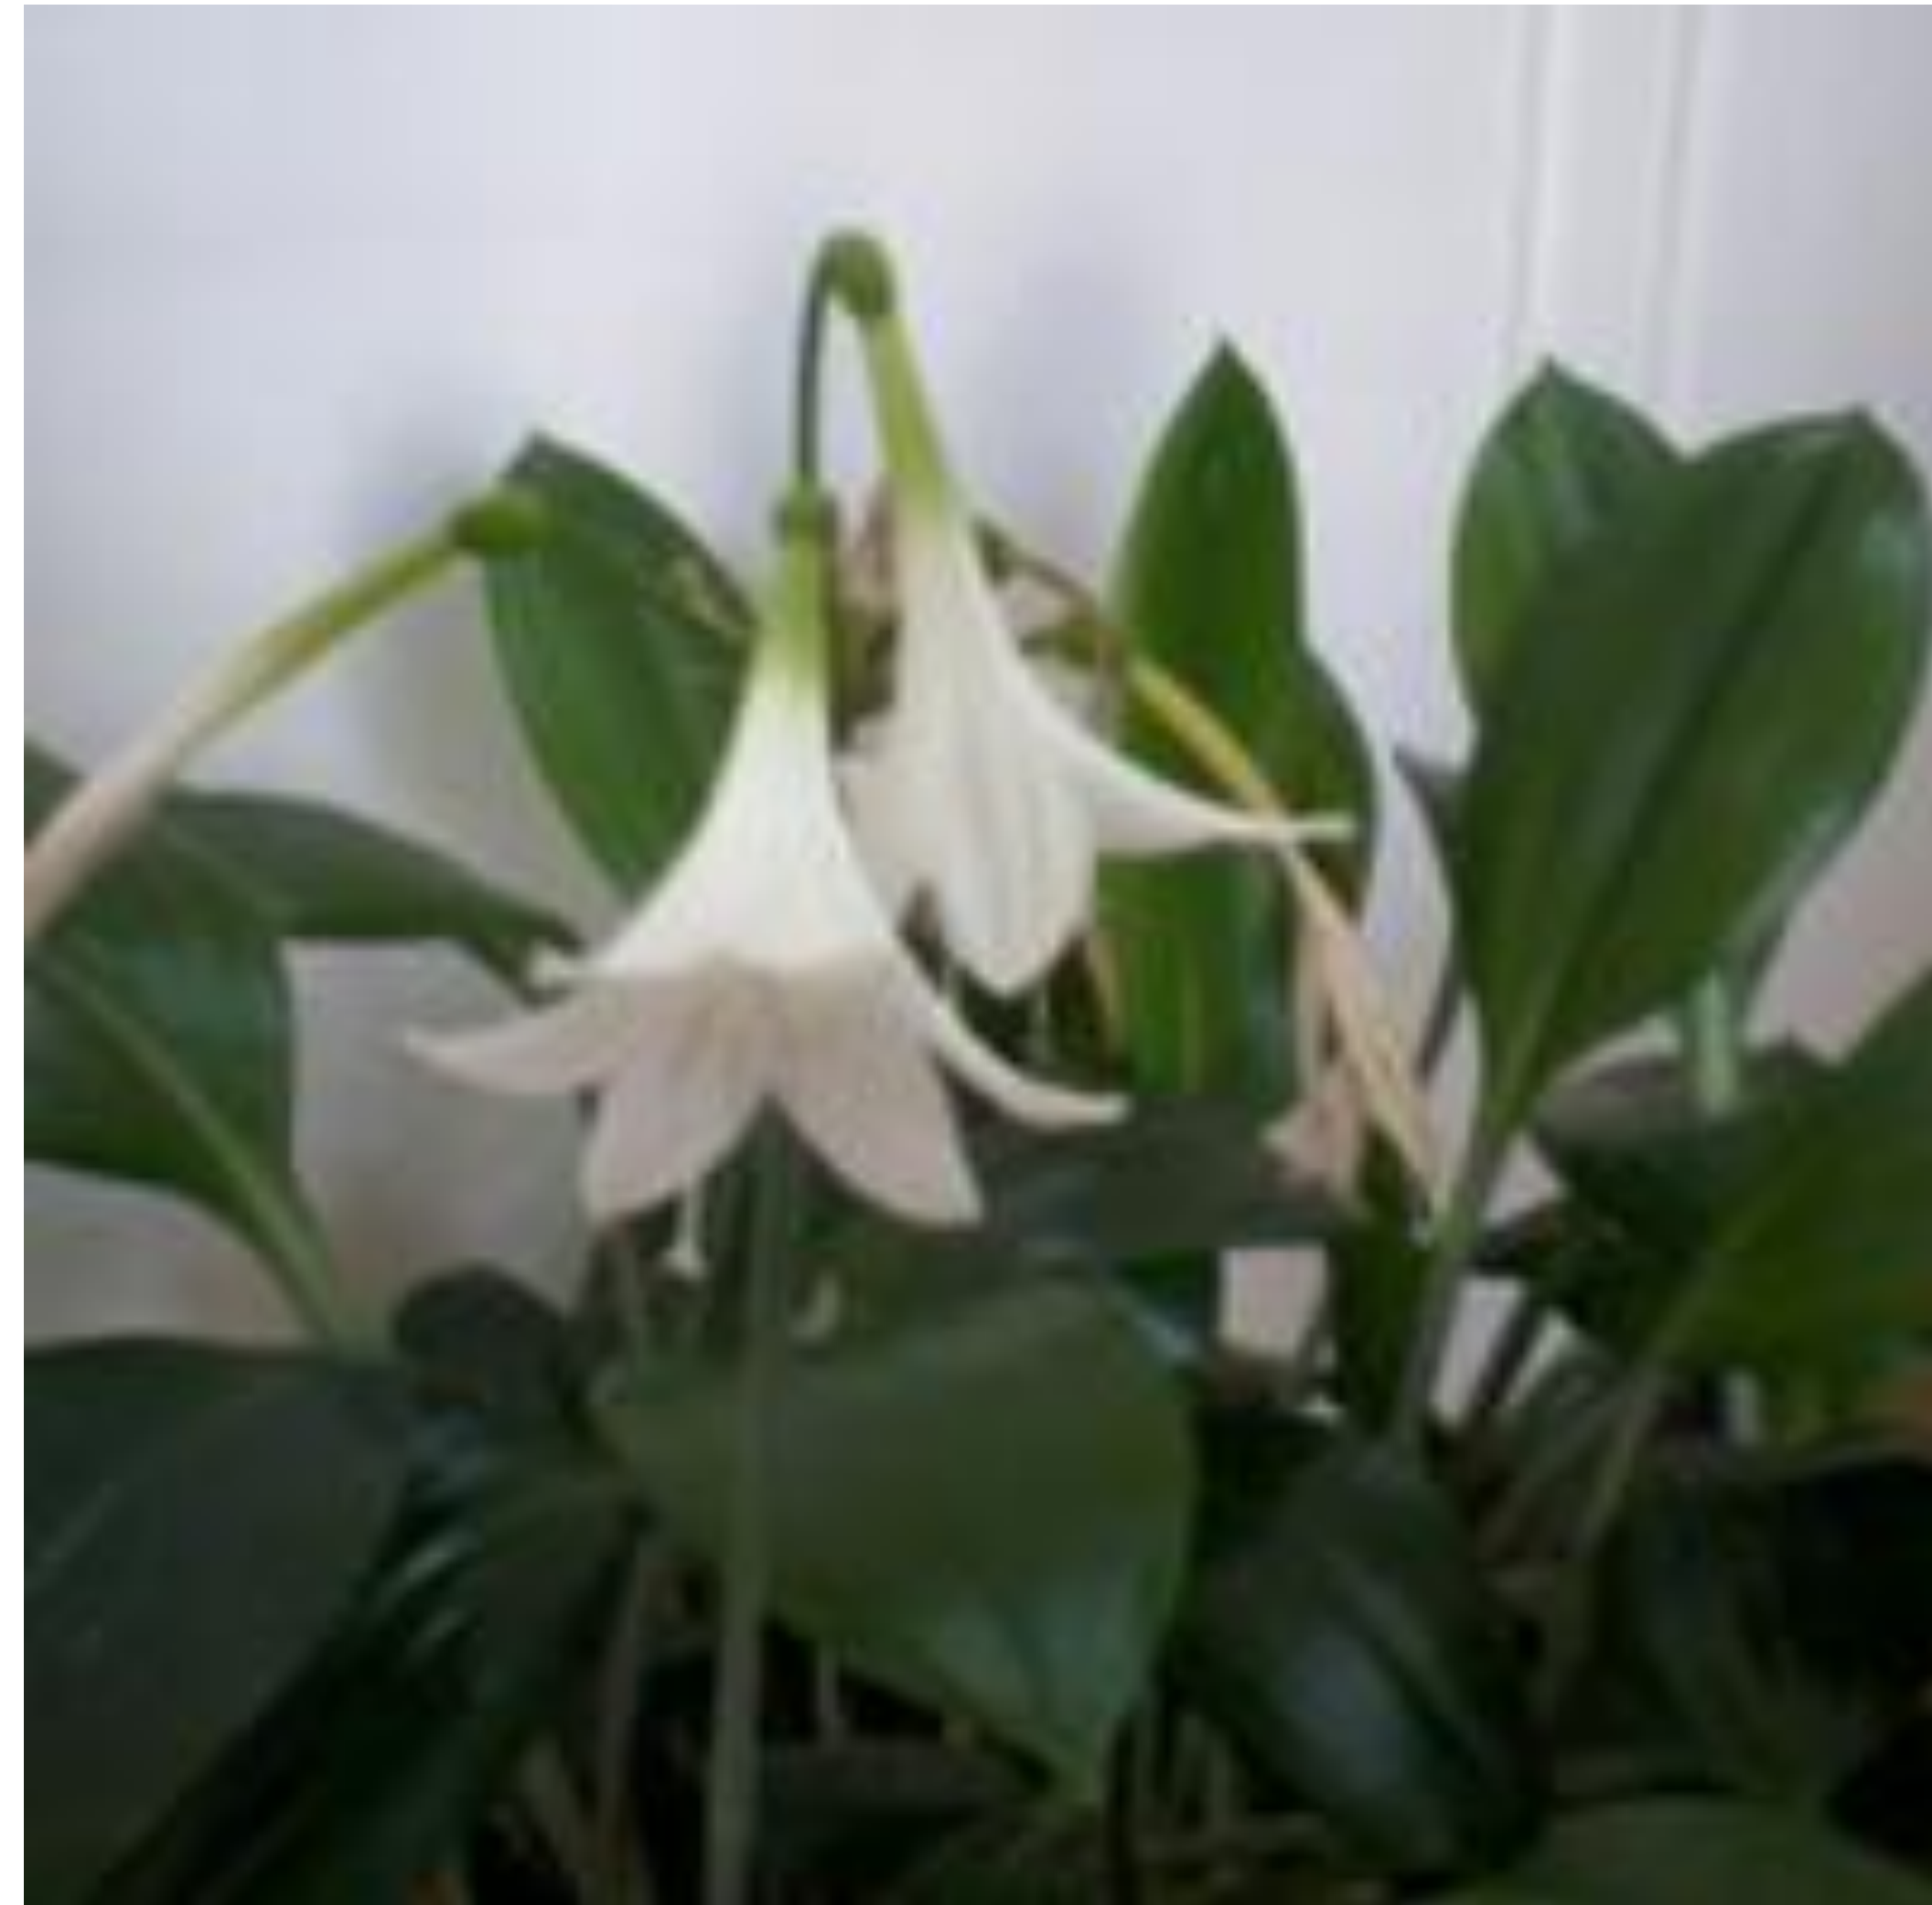

Alkaloids with anticancer potential  
but low extraction yield

## Conventional and unconventional extraction

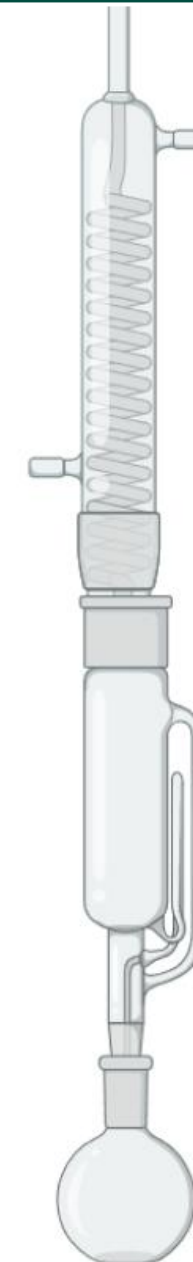

Soxhlet

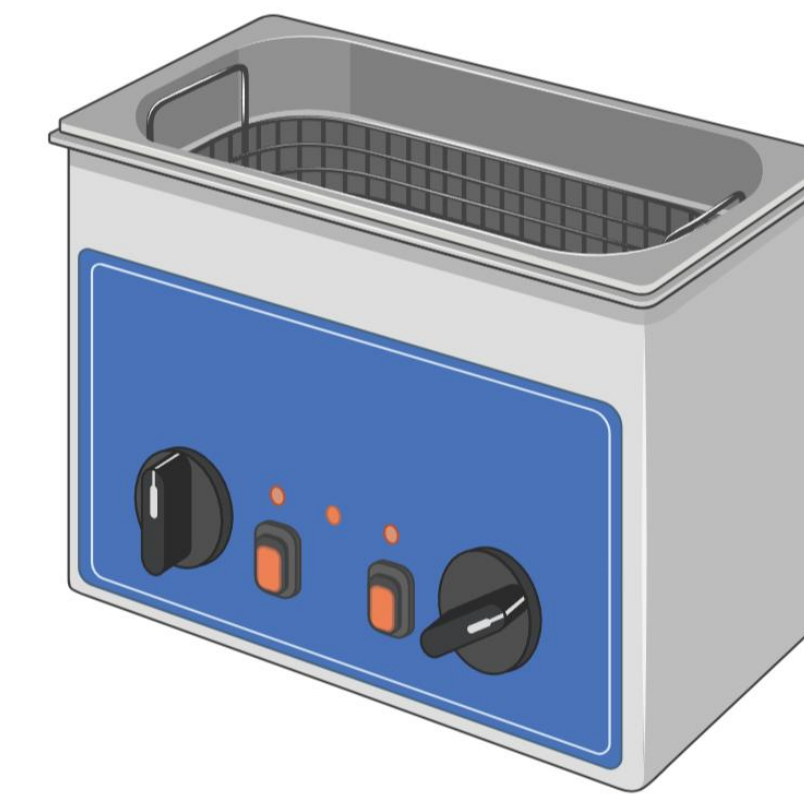

BUAE

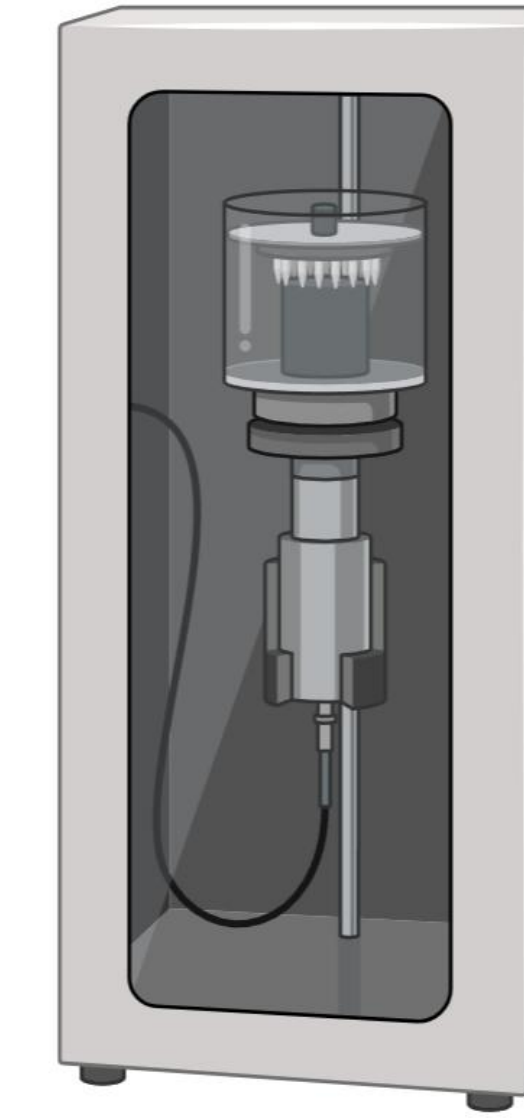

HIUAE

## Alkaloid profiling

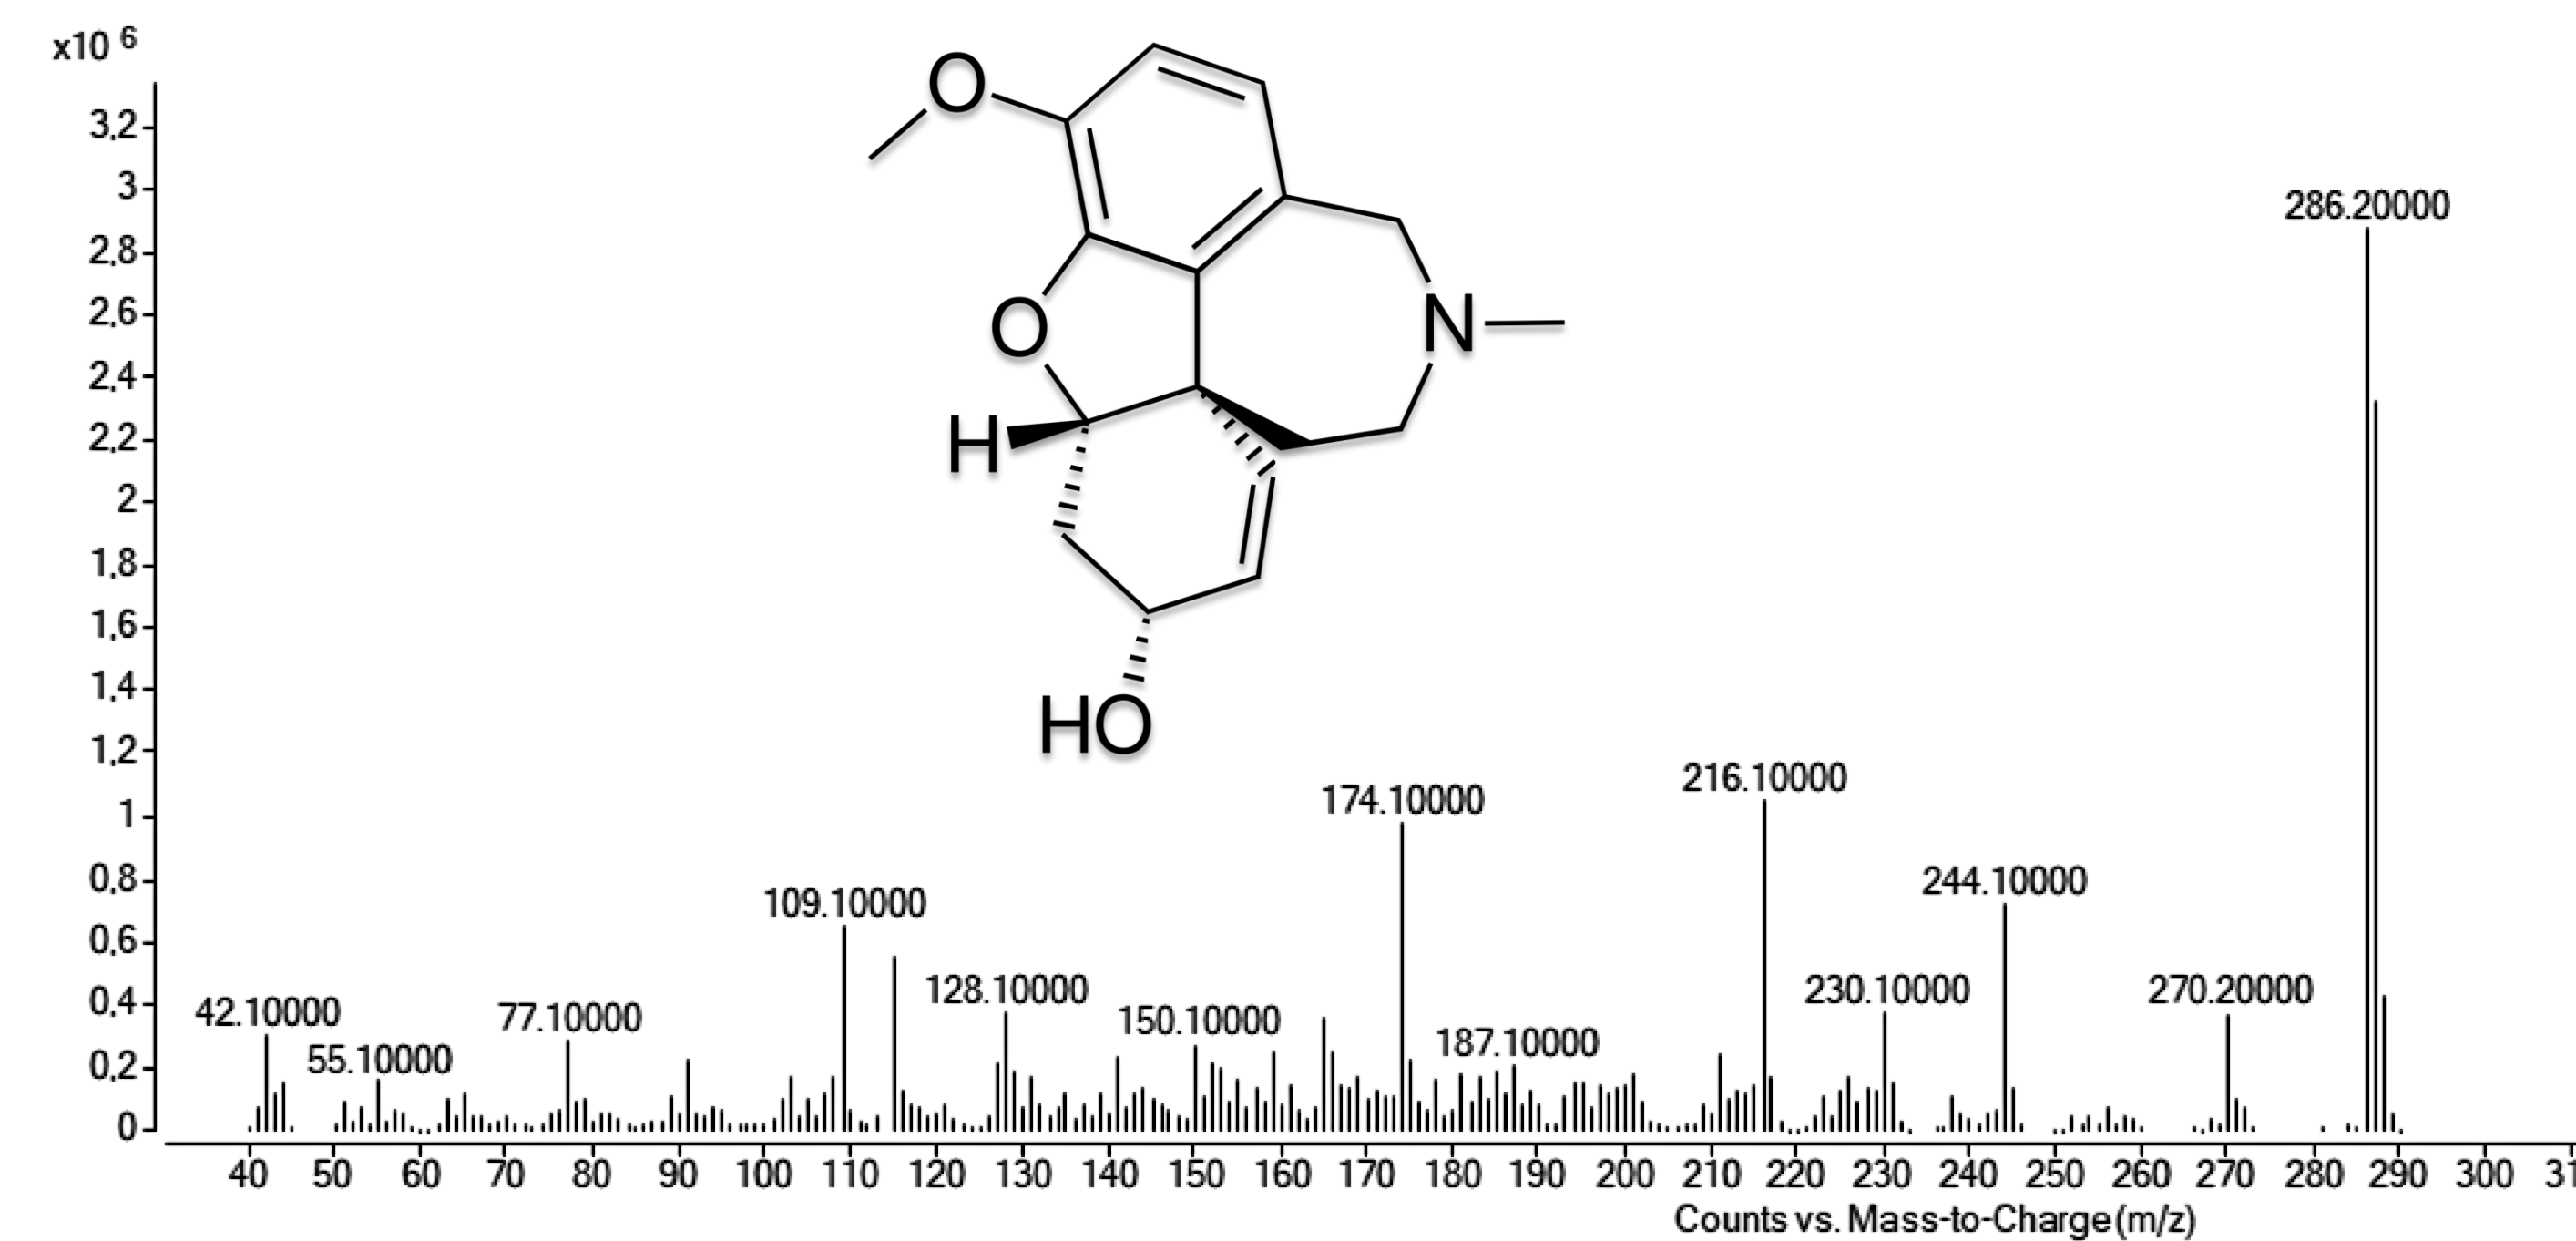

GC-MS

## High-intensity ultrasound-assisted extraction (HIUAE)

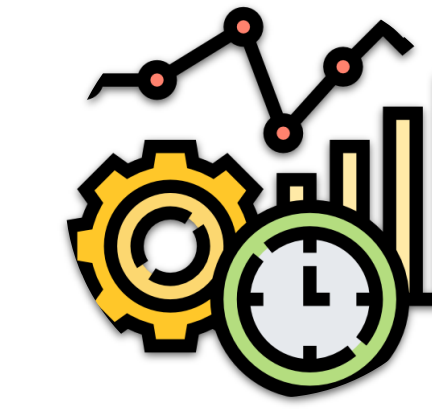

Rapid, efficient and green method

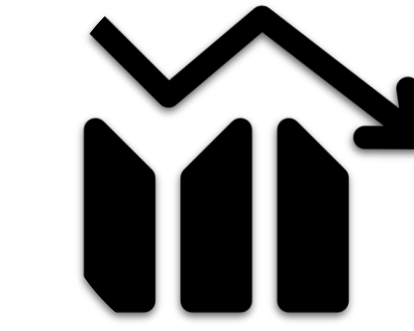

Reduction in solvent consumption

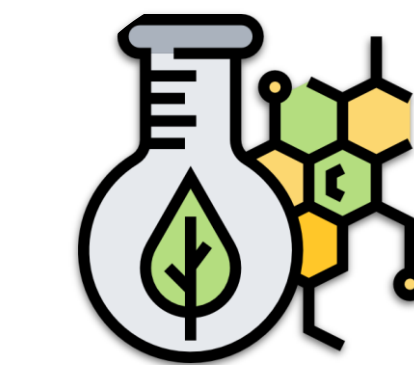

Increase Alkaloid extraction

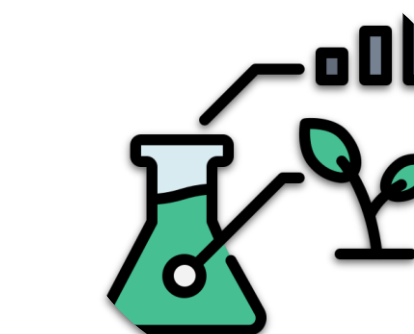

Enrichment of the alkaloid profile

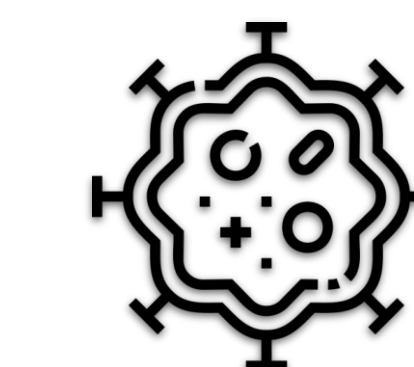

Increased cytotoxicity in AGS cells
